# Supplementary material
Source: PubMed Central journal article supplement (PMC4079137)
Supplement: CJP-2014-vol59-May-259-267-eTables.pdf [file CJP-2014-vol59-May-259-267-eTables.pdf]

Martin MS, Dorken SK, Colman I, et al. The incidence and prediction of self-injury among sentenced prisoners. *Can J Psychiatry*. 2014;59(5):259–267.

**eTable 3.** Proportion of individuals in each group of the intake tree with selected risk factors.

|                            | % in group with risk factor |      |      |      |      |      |      |
|----------------------------|-----------------------------|------|------|------|------|------|------|
|                            | NC-H                        | Hx-H | Hx-M | NC-L | LR   | Hx-L | LC   |
| Female                     | 8.2                         | 9.2  | 7.9  | 5.3  | 5.7  | 28.9 | 9.8  |
| Aboriginal                 | 37.2                        | 36.4 | 24.4 | 13.8 | 19.5 | 8.1  | 6.8  |
| No OIA                     | 0                           | 0    | 0    | 0    | 13.5 | 84.2 | 85.0 |
| Social history factors     |                             |      |      |      |      |      |      |
| None                       | 0.9                         | 0    | 5.8  | 7.5  | 7.3  | --   | --   |
| 4 or more                  | 78.2                        | 95.8 | 48.0 | 46.3 | 52.7 | --   | --   |
| All 7                      | 20.1                        | 30.0 | 0    | 5.3  | 6.7  | --   | --   |
| 1+ family history factors  |                             |      |      |      |      |      |      |
| Substance abuse            | 75.4                        | 91.7 | 71.4 | 45.2 | 55.2 | 62.2 | 27.0 |
| Prior youth offences       | 59.7                        | 69.0 | 39.4 | 36.4 | 43.2 | --   | --   |
| Prior adult offences       | 89.6                        | 88.7 | 79.8 | 70.6 | 78.7 | --   | --   |
| Violent incidents          | 11.2                        | 10.7 | 5.2  | 7.2  | 4.2  | 2.6  | 3.5  |
| Disciplinary incidents     | 15.9                        | 14.5 | 5.4  | 13.4 | 8.4  | 5.3  | 5.2  |
| Segregation                | 31.5                        | 30.6 | 21.0 | 23.1 | 13.1 | 13.2 | 11.0 |
| Treatment centre admission | 8.8                         | 11.6 | 4.1  | 4.7  | 1.6  | 7.9  | 1.7  |
| Primary MH services        | 57.1                        | 89.6 | 87.7 | 43.6 | 69.0 | 89.5 | 32.9 |
| Suicide awareness          | 17.5                        | 27.9 | 40.9 | 19.9 | 31.6 | 44.7 | 15.6 |
| DHS                        |                             |      |      |      |      |      |      |
| Exceed any cut-off         | --                          | 100  | 100  | --   | 66.5 | 100  | --   |
| Exceed 3+ cut-offs         | --                          | 95.8 | 92.9 | --   | 21.7 | 92.1 | --   |
| BSI                        |                             |      |      |      |      |      |      |
| Exceed any cut-off         | --                          | 94.1 | 91.8 | --   | 71.2 | 97.4 | --   |
| Exceed 5+ cut-offs         | --                          | 75.4 | 67.0 | --   | 31.6 | 84.2 | --   |

**eTable 4.** Proportion of individuals in each group of the event tree with selected risk factors.

|                            | % in group with risk factor |       |       |      |      |      |      |      |      |      |      |
|----------------------------|-----------------------------|-------|-------|------|------|------|------|------|------|------|------|
|                            | TC-H                        | Hx-H1 | Hx-H2 | FR   | TC-M | Hx-L | NFR  | LR   | LC   | YLC  | OLC  |
| Female                     | 5.1                         | 21.4  | 11.7  | 7.7  | 3.6  | 8.5  | 5.5  | 5.7  | 11.3 | 9.0  | 5.4  |
| Aboriginal                 | 27.8                        | 29.0  | 30.0  | 36.8 | 35.0 | 28.4 | 13.9 | 19.3 | 3.4  | 33.8 | 10.5 |
| No OIA                     | 1.7                         | 1.4   | 3.3   | 0    | 2.7  | 4.9  | 0    | 13.7 | 86.8 | 11.7 | 21.7 |
| Social history factors     |                             |       |       |      |      |      |      |      |      |      |      |
| None                       | 1.7                         | 3.0   | 3.4   | 1.6  | 4.6  | 3.0  | 8.3  | 7.3  | --   | 1.5  | 5.0  |
| At least 4                 | 83.6                        | 69.7  | 82.8  | 76.9 | 78.0 | 68.5 | 46.3 | 52.4 | --   | 71.7 | 48.0 |
| All 7                      | 26.8                        | 17.9  | 21.8  | 18.4 | 24.5 | 10.4 | 5.5  | 6.5  | --   | 17.0 | 5.2  |
| 1+ family history factors  | 73.2                        | 68.7  | 86.2  | 100  | 79.8 | 76.3 | 0    | 54.1 | --   | 64.8 | 41.1 |
| Substance abuse            | 79.7                        | 80.0  | 86.7  | 78.8 | 82.1 | 78.7 | 47.3 | 54.8 | 24.0 | 57.8 | 40.7 |
| Prior youth offences       | 51.7                        | 52.9  | 72.4  | 56.1 | 56.0 | 49.8 | 36.8 | 43.3 | --   | 70.0 | 15.0 |
| Prior adult offences       | 87.9                        | 78.3  | 87.9  | 96.5 | 84.4 | 83.6 | 78.6 | 78.7 | --   | 66.5 | 76.2 |
| Violent incidents          | 15.3                        | 7.1   | 16.7  | 8.5  | 15.2 | 5.6  | 7.7  | 4.0  | 1.9  | 14.8 | 0.8  |
| Disciplinary incidents     | 13.6                        | 2.9   | 100   | 12.7 | 16.1 | 0    | 14.3 | 8.3  | 2.8  | 22.4 | 4.7  |
| Segregation                | 32.2                        | 25.7  | 46.7  | 30.1 | 28.6 | 21.8 | 22.5 | 12.9 | 7.5  | 37.7 | 7.0  |
| Treatment centre admission | 100                         | 0     | 0     | 0    | 100  | 0    | 0    | 0    | 0    | 0    | 0    |
| Primary MH services        | 81.4                        | 94.3  | 90.0  | 54.8 | 96.4 | 86.8 | 45.1 | 68.5 | 25.5 | 48.0 | 43.4 |
| Suicide awareness          | 18.6                        | 32.9  | 23.3  | 17.0 | 18.8 | 37.8 | 18.1 | 32.0 | 13.2 | 17.9 | 23.3 |
| DHS                        |                             |       |       |      |      |      |      |      |      |      |      |
| Exceed any cut-off         | --                          | 100   | 100   | --   | 89.3 | 100  | --   | 66.3 | --   | --   | --   |
| Exceed 3+ cut-offs         | --                          | 98.6  | 93.3  | --   | 69.6 | 93.2 | --   | 21.4 | --   | --   | --   |
| BSI                        |                             |       |       |      |      |      |      |      |      |      |      |
| Exceed any cut-off         | --                          | 97.1  | 90.0  | --   | 84.8 | 92.6 | --   | 71.1 | --   | --   | --   |
| Exceed 5+ cut-offs         | --                          | 87.1  | 75.0  | --   | 62.5 | 67.9 | --   | 31.5 | --   | --   | --   |
